# Supplementary material
Source: Springer Nature journal article supplement (https://www.springermedizin.de/resource/supplementary/13049_2013_710_MOESM5_ESM.pdf/9666948)

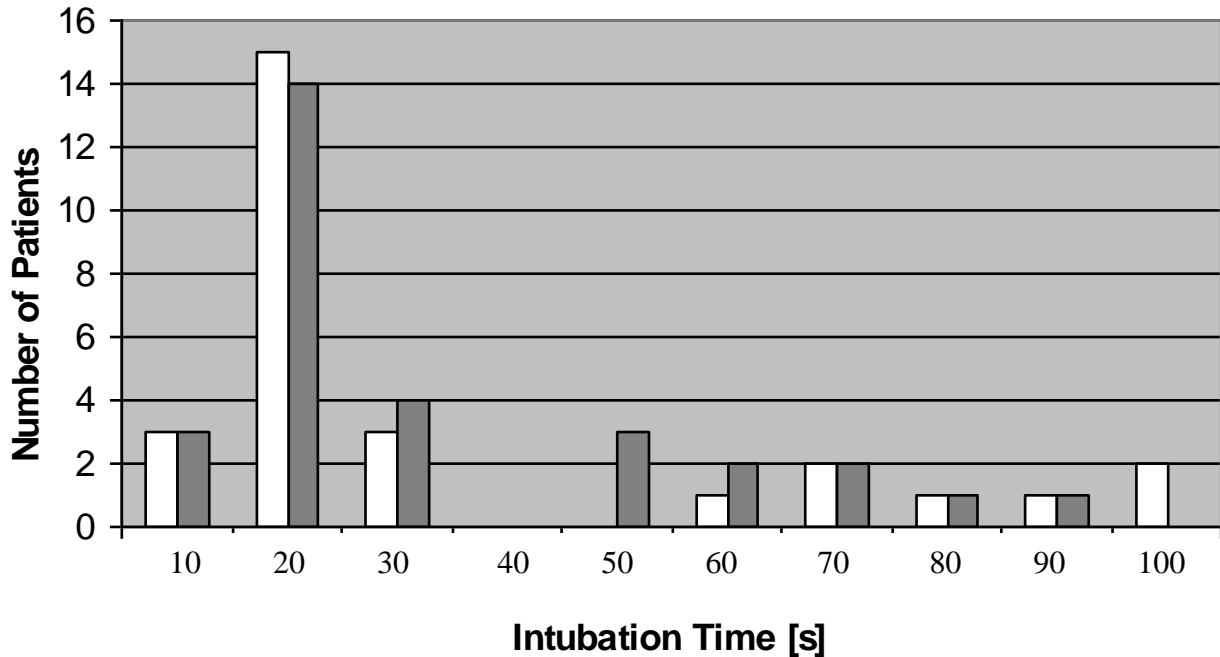

Supplement: MOESM5 [file 9666948]
